# Supplementary material for: Elimination of micropollutants by the solar/chlorine process: contribution of reactive species and formation risk of NDMA
Source: Royal Society of Chemistry journal article supplement (doi:10.1039/d1ew00965f), 2022-01-01
Supplement: d1ew00965f1.pdf [file d1ew00965f1.pdf]

## **Supplementary Information for:**

### **Elimination of micropollutants by solar/chlorine process:**

### **Contribution of reactive species and formation risk of NDMA**

Wei Zhang<sup>a</sup>, Nan Li<sup>a</sup>, Caiwen Wang<sup>a</sup>, Guangchao Li<sup>b</sup>, Julong Sun<sup>b</sup>, Shumin Zhu<sup>b</sup>, \*,  
Shiqing Zhou<sup>b</sup>

*a. Hunan Provincial Village Drinking Water Quality Safety Engineering Technology  
Research Center, Yiyang, 413000, China*

*b. Key Laboratory of Building Safety and Energy Efficiency, Ministry of Education,  
Department of Water Engineering and Science, College of Civil Engineering, Hunan  
University, Changsha, Hunan 410082, China*

*\* Corresponding author*

*Email address: [zshuminwater@163.com](mailto:zshuminwater@163.com) (S. Zhu)*

Text: S1-S2

Tables: S1-S2

Figures: S1

Pages Numbers: 7

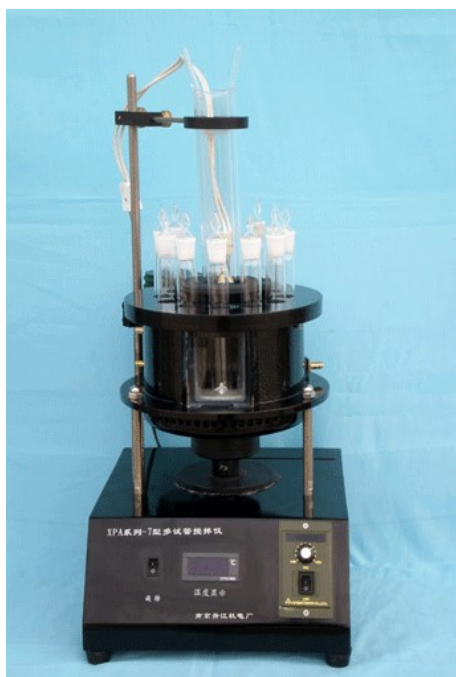

**Figure S1.** Setup of photochemical reactor.

**Table S1 analytical methods.**

|               | <b>Methanol</b> | <b>Ultrapure<br/>water</b> | <b>Wavelength(nm<br/>)</b> | <b>Injection<br/>volume(<math>\mu</math>L)</b> |
|---------------|-----------------|----------------------------|----------------------------|------------------------------------------------|
| <b>Diuron</b> | 80%             | 20%                        | 254                        | 20                                             |
| <b>NB</b>     | 70%             | 30%                        | 263                        | 50                                             |

**Table S2 HPLC-MS/MS data of possible organic products formed during the diuron degradation at negative mode.**

| Compound      | [M+H] <sup>+</sup><br>(m/z) | Chemical formula                                                             | Proposed structure                                                                   |
|---------------|-----------------------------|------------------------------------------------------------------------------|--------------------------------------------------------------------------------------|
| <b>Diuron</b> | 233.0                       | C <sub>9</sub> H <sub>10</sub> Cl <sub>2</sub> N <sub>2</sub> O              | 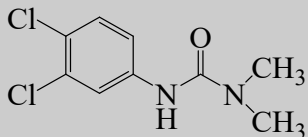   |
| <b>TP1</b>    | 249.0                       | C <sub>9</sub> H <sub>10</sub> Cl <sub>2</sub> N <sub>2</sub> O <sub>2</sub> |    |
| <b>TP2</b>    | 247.0                       | C <sub>9</sub> H <sub>8</sub> Cl <sub>2</sub> N <sub>2</sub> O <sub>2</sub>  |   |
| <b>TP3</b>    | 263.0                       | C <sub>9</sub> H <sub>8</sub> Cl <sub>2</sub> N <sub>2</sub> O <sub>3</sub>  |  |
| <b>TP4</b>    | 261.0                       | C <sub>9</sub> H <sub>6</sub> Cl <sub>2</sub> N <sub>2</sub> O <sub>3</sub>  |  |
| <b>TP5</b>    | 293.0                       | C <sub>9</sub> H <sub>6</sub> Cl <sub>2</sub> N <sub>2</sub> O <sub>5</sub>  |  |
| <b>TP6</b>    | 250.0                       | C <sub>9</sub> H <sub>11</sub> Cl <sub>2</sub> N <sub>2</sub> O <sub>2</sub> |  |
| <b>TP7</b>    | 215.1                       | C <sub>9</sub> H <sub>11</sub> ClN <sub>2</sub> O <sub>2</sub>               |  |
| <b>TP8</b>    | 126.1                       | C <sub>6</sub> H <sub>6</sub> ClNO                                           |  |



**Text S1** Detailed experimental procedures.

Solar exposure was proceeded in a specially designed photochemical reactor (XPA-7, Xujiang Electromechanical Plant, Nan Jing, China) equipped with a 500-W Xenon lamp with daylight filter (cutoff below 290 nm) and infrared radiation filter to generate simulated sunlight. A 1.67 mL volume test solution with diuron (0.15 mM) was prepared in a quartz tube and buffered by 2.5 mM phosphate buffer solution (pH = 6 – 8). Sodium hypochlorite solution was added into the tube to reach a desire concentration of available chlorine (100, 200, 300  $\mu$ M) and simultaneously exposed to solar irradiation. The temperature was controlled at  $25 \pm 1$  °C. Control experiments of diuron degradation were conducted in a similar procedure by direct dark chlorination and solar irradiation, respectively.

## **Text S2** Detailed analytical methods.

HPLC (Agilent 1260, USA) equipped with a C18 column (150 mm×4.6 mm×5 μm, Agilent, USA) and a variable wavelength detector (VWD) (Agilent, USA) was used to determine the concentration of diuron. The wavelength of detector was set at 254 nm. The mobile phase was a mixture of methanol and ultrapure water (1‰ formic acid) at a ratio of 80: 20 and the flow rate at 1.0 mL min<sup>-1</sup>.

HPLC-MS/MS (Agilent 1290/6460 Triple Quad) equipped with a Symmetry C18 column (50 mm × 2.1 mm × 5 mm, Agilent, USA) in positive electrospray ionization (ESI) mode was used to identify NDMA and the transformation products of diuron. When detected the transformation products, the mobile phase consisted of ultrapure water as solvent A (1‰ formic acid) and acetonitrile as solvent B at a flow rate of 0.2 mL min<sup>-1</sup>, with a gradient elution program as follows: 5% to 70% B from 0 to 7 min; 70% to 95% B from 7 to 8 min; 95% to 5% B from 8 to 9 min; 5% B from 9 to 10 min. The injection volume was 5 μL, and column temperature was 25 °C. When quantified the formed NDMA, HPLC-MS/MS was set at positive mode using MRM method by monitoring the product ions of 58.2 and 42.9 m/z. The mobile phase was a mixture of methanol and ultrapure water (1‰ formic acid) at a ratio of 50:50 and the flow rate at 0.2 mL min<sup>-1</sup>.

The molar yields of NDMA were calculated by dividing the formed NDMA concentrations with the initial diuron concentrations, as shown in the following equation:

$$\text{NDMA yield(\%)} = \frac{[\text{NDMA}]}{[\text{diuron}]_0} \times 100$$
